# Supplementary material for: The effect of soil moisture content and soil texture on fast in situ pH measurements with two types of robust ion-selective electrodes
Source: Copernicus journal article supplement (doi:10.5194/egusphere-2023-1470), 2023-10-20
Supplement: Supplementary file 1 [file egusphere-2023-1470-supplement.pdf]

## Supplementary Material

**Table S1: Measured soil pH values (Mean and Standard deviation) at varying SMCs and soil textures 1.**

| Soil texture | SMC<br>[Mass %] | Mean, pH<br>[Epoxy-body] | Mean, pH<br>[Antimony] | StdDev, pH<br>[Epoxy-body] | StdDev, pH<br>[Antimony] |
|--------------|-----------------|--------------------------|------------------------|----------------------------|--------------------------|
| Ss           | 0               | 4                        | 4.33                   | 0.08                       | 0.06                     |
|              | 2.91            | 4.2                      | 4.48                   | 0.05                       | 0.05                     |
|              | 5.79            | 4.4                      | 4.57                   | 0.03                       | 0.03                     |
|              | 8.32            | 4.65                     | 4.61                   | 0.01                       | 0.01                     |
|              | 10.79           | 4.75                     | 5.35                   | 0.01                       | 0.02                     |
|              | 13.22           | 5.19                     | 5.44                   | 0.02                       | 0.02                     |
|              | 15.51           | 5.23                     | 5.4                    | 0.02                       | 0.01                     |
|              | 15.81           | 5.17                     | 5.41                   | 0.01                       | 0.01                     |
| Su3          | 0               | 5.5                      | 4.93                   | 0.16                       | 0.1                      |
|              | 2.95            | 5.68                     | 5.09                   | 0.02                       | 0.09                     |
|              | 5.78            | 6.04                     | 5.21                   | 0.01                       | 0.08                     |
|              | 8.32            | 6.08                     | 5.31                   | 0.01                       | 0.01                     |
|              | 10.90           | 6.09                     | 5.54                   | 0.01                       | 0.02                     |
|              | 13.32           | 6.11                     | 5.59                   | 0.01                       | 0.02                     |
|              | 15.54           | 6.12                     | 5.76                   | 0.01                       | 0.02                     |
|              | 17.47           | 6.15                     | 6.05                   | 0.01                       | 0.01                     |
|              | 19.61           | 6.21                     | 6.26                   | 0.01                       | 0.02                     |
|              | 20.18           | 6.21                     | 6.26                   | 0.02                       | 0.01                     |
| Sl4          | 0               | 4.95                     | 5.1                    | 0.19                       | 0.16                     |
|              | 2.93            | 5.25                     | 5.23                   | 0.07                       | 0.04                     |
|              | 5.87            | 5.56                     | 5.34                   | 0.01                       | 0.04                     |
|              | 8.40            | 5.93                     | 5.69                   | 0.02                       | 0.02                     |
|              | 11.00           | 5.99                     | 6.07                   | 0.01                       | 0.02                     |
|              | 13.29           | 6.01                     | 6.15                   | 0.01                       | 0.02                     |
|              | 15.66           | 5.97                     | 6.11                   | 0.01                       | 0.01                     |
|              | 17.71           | 5.98                     | 6.14                   | 0.01                       | 0.02                     |
|              | 19.70           | 6.02                     | 6.2                    | 0.01                       | 0.02                     |
|              | 20.81           | 6.03                     | 6.23                   | 0.01                       | 0.02                     |
| Ls4          | 0               | 4.79                     | 4.94                   | 0.1                        | 0.28                     |
|              | 2.96            | 6.46                     | 5.32                   | 0.04                       | 0.2                      |
|              | 5.83            | 6.48                     | 5.73                   | 0.02                       | 0.02                     |

|     |       |      |      |      |      |
|-----|-------|------|------|------|------|
|     | 8.35  | 6.5  | 5.89 | 0.01 | 0.05 |
|     | 10.86 | 6.51 | 6.38 | 0.02 | 0.02 |
|     | 13.44 | 6.55 | 6.42 | 0.01 | 0.02 |
|     | 15.61 | 6.59 | 6.46 | 0.01 | 0.02 |
|     | 17.73 | 6.61 | 6.44 | 0.01 | 0.02 |
|     | 19.61 | 6.6  | 6.41 | 0.02 | 0.01 |
| Slu | 0     | 5.12 | 5.15 | 0.07 | 0.11 |
|     | 2.95  | 5.75 | 5.32 | 0.06 | 0.08 |
|     | 5.88  | 6    | 5.49 | 0.01 | 0.08 |
|     | 8.5   | 6.15 | 5.6  | 0.01 | 0.04 |
|     | 10.91 | 6.23 | 5.82 | 0.02 | 0.02 |
|     | 13.36 | 6.38 | 6    | 0.01 | 0.02 |
|     | 15.6  | 6.68 | 6.08 | 0.02 | 0.01 |
|     | 17.68 | 6.71 | 6.37 | 0.01 | 0.01 |
|     | 19.83 | 6.74 | 6.56 | 0.02 | 0.01 |
|     | 21.66 | 6.69 | 6.69 | 0.02 | 0.01 |
|     | 23.61 | 6.75 | 6.68 | 0.02 | 0.01 |
|     | 23.99 | 6.71 | 6.63 | 0.02 | 0.02 |

**Table S2: Measured soil pH values (Mean and Standard deviation) at varying SMCs and soil textures 2.**

| Soil texture | SMC<br>[Mass %] | Mean, pH<br>[Epoxy-body] | Mean, pH<br>[Antimony] | StdDev, pH<br>[Epoxy-body] | StdDev, pH<br>[Antimony] |
|--------------|-----------------|--------------------------|------------------------|----------------------------|--------------------------|
| Lt2          | 0.00            | 5.25                     | 5.6                    | 0.21                       | 0.32                     |
|              | 3.85            | 6.44                     | 5.61                   | 0.2                        | 0.15                     |
|              | 7.87            | 7.01                     | 5.87                   | 0.02                       | 0.01                     |
|              | 10.97           | 7.04                     | 6.01                   | 0.02                       | 0.03                     |
|              | 14.32           | 7.1                      | 6.36                   | 0.01                       | 0.02                     |
|              | 17.62           | 7.11                     | 6.63                   | 0.01                       | 0.01                     |
|              | 20.58           | 7.14                     | 6.7                    | 0.01                       | 0.02                     |
|              | 23.21           | 7.24                     | 6.91                   | 0.01                       | 0.01                     |
|              | 25.59           | 7.4                      | 7.15                   | 0.02                       | 0.01                     |
|              | 27.74           | 7.43                     | 7.14                   | 0.01                       | 0.01                     |
| Lts          | 0               | 4.73                     | 4.42                   | 0.05                       | 0.22                     |
|              | 3.88            | 5.2                      | 5.23                   | 0.02                       | 0.06                     |
|              | 7.61            | 5.86                     | 5.5                    | 0.02                       | 0.02                     |
|              | 10.9            | 5.94                     | 5.97                   | 0.01                       | 0.01                     |
|              | 14.18           | 5.99                     | 6.08                   | 0.01                       | 0.02                     |

|     |       |      |      |      |      |
|-----|-------|------|------|------|------|
|     | 17.04 | 6.1  | 6.3  | 0.01 | 0.01 |
|     | 19.87 | 6.25 | 6.24 | 0.02 | 0.01 |
|     | 21.41 | 6.23 | 6.27 | 0.01 | 0.01 |
|     | 0.00  | 5.43 | 5    | 0.15 | 0.2  |
|     | 3.93  | 5.68 | 5.53 | 0.03 | 0.02 |
|     | 7.57  | 5.98 | 5.83 | 0.04 | 0.03 |
|     | 10.84 | 6.06 | 6.24 | 0.01 | 0.02 |
| Ts4 | 14.17 | 6.1  | 6.24 | 0.01 | 0.02 |
|     | 16.30 | 6.27 | 6.24 | 0.01 | 0.02 |
|     | 18.47 | 6.3  | 6.26 | 0.01 | 0.02 |
|     | 20.25 | 6.33 | 6.24 | 0.01 | 0.01 |
|     | 20.87 | 6.38 | 6.26 | 0.01 | 0.01 |
|     | 0     | 4.55 | 4.22 | 0.2  | 0.3  |
|     | 3.84  | 5.18 | 4.97 | 0.04 | 0.06 |
|     | 7.64  | 5.9  | 5.41 | 0.02 | 0.03 |
|     | 10.92 | 6.09 | 5.82 | 0.02 | 0.01 |
|     | 14.1  | 6.18 | 6.09 | 0.01 | 0.02 |
| Tl  | 17.23 | 6.26 | 6.14 | 0.01 | 0.02 |
|     | 19.97 | 6.21 | 6.17 | 0.01 | 0.02 |
|     | 22.46 | 6.23 | 6.21 | 0.02 | 0.01 |
|     | 25.1  | 6.27 | 6.18 | 0.02 | 0.02 |
|     | 28.15 | 6.22 | 6.25 | 0.02 | 0.01 |
|     | 0.00  | 4.24 | 4.46 | 0.14 | 0.27 |
|     | 3.98  | 5.87 | 5.37 | 0.03 | 0.03 |
|     | 7.71  | 5.98 | 5.74 | 0.02 | 0.02 |
|     | 10.88 | 6.12 | 6.01 | 0.02 | 0.02 |
|     | 14.20 | 6.35 | 6.1  | 0.01 | 0.02 |
|     | 17.38 | 6.5  | 6.43 | 0.01 | 0.01 |
| Tt  | 20.14 | 6.57 | 6.49 | 0.02 | 0.02 |
|     | 22.49 | 6.58 | 6.47 | 0.02 | 0.02 |
|     | 24.57 | 6.64 | 6.47 | 0.01 | 0.01 |
|     | 26.97 | 6.65 | 6.45 | 0.02 | 0.01 |
|     | 28.57 | 6.66 | 6.44 | 0.02 | 0.01 |
